# Supplementary material for: High allelic diversity in Arabidopsis NLRs is associated with distinct genomic features
Source: PubMed Central journal article supplement (PMC11093987; doi:10.1038/s44319-024-00122-9), 2024-03-25
Supplement: 44319_2024_122_MOESM10_ESM.pdf [file 44319_2024_122_MOESM10_ESM.pdf]

## Expanded View Figures

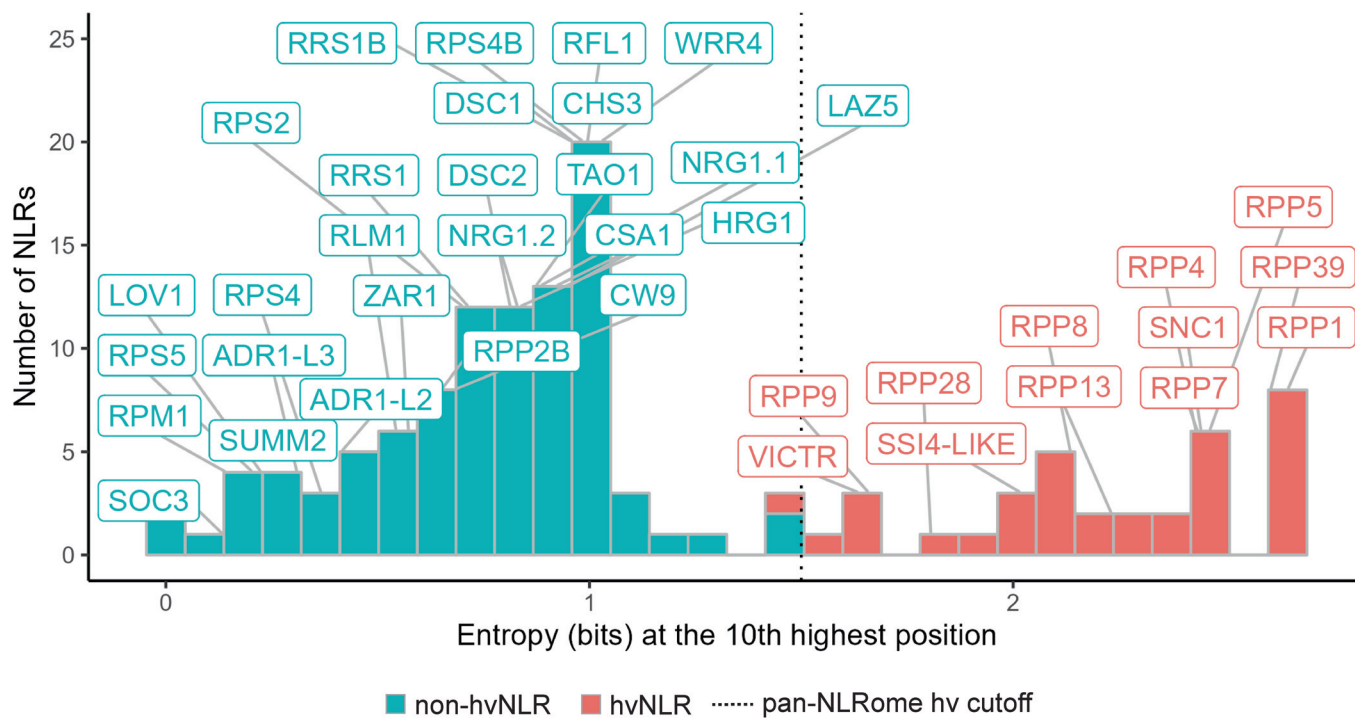

**Figure EV1. *Arabidopsis* Col-0 Shannon entropy at the tenth highest amino acid position.**

Distribution of NLR Shannon entropy per sequence at the tenth highest amino acid position as shown by a histogram with 30 bins. Named NLRs with previous functional characterization are labeled on the graph. The designation of hvNLR is entropy of >1.5 bits at the tenth highest position across the *Arabidopsis* NLRome, as shown by the dashed line. Source data are available online for this figure.

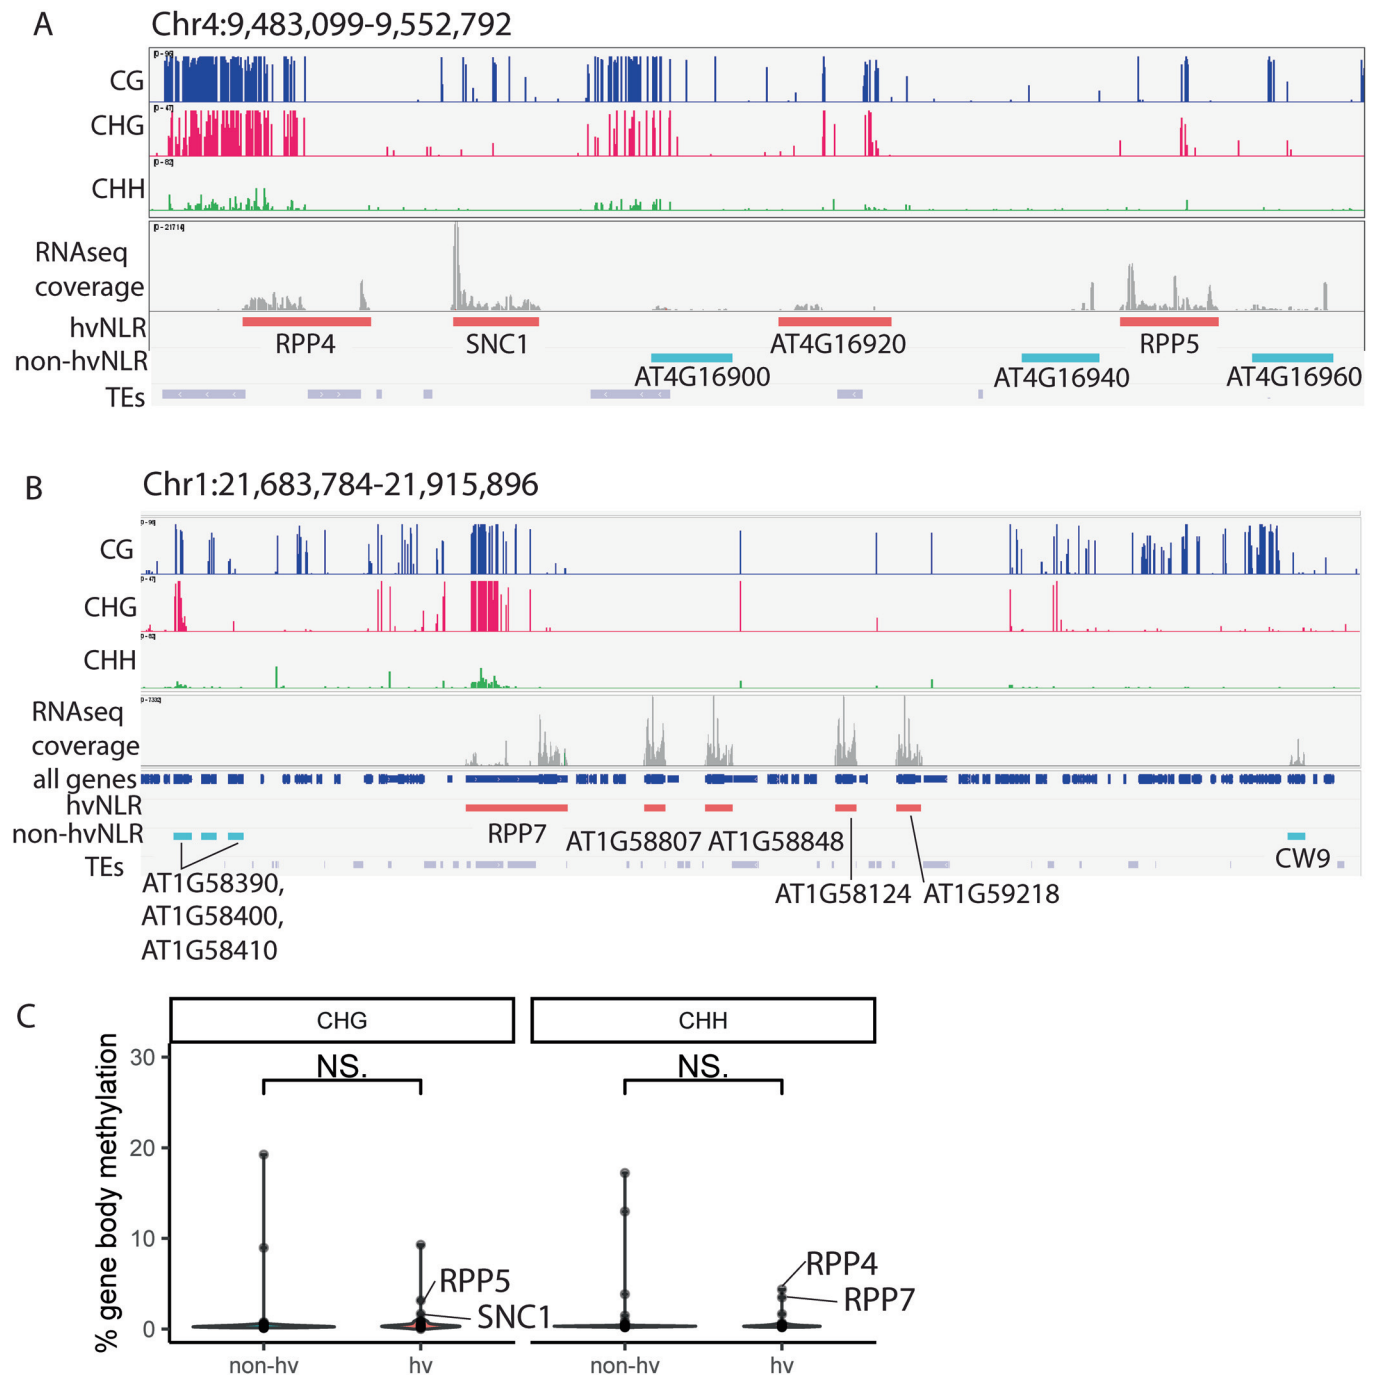

**Figure EV2. Multi-context methylation of two NLR clusters likely due to recent TE insertion.**

(A, B) Integrative Genomics Viewer screenshot of methylation, RNAseq coverage, and TE proximity of the *RPP4* and *RPP7* clusters in rosette leaf tissue. (C) % CHG and CHH gene body methylation of non-hv and hvNLRs in rosette leaf tissue. Named *RPP4* and *RPP7* cluster members are labeled. Data Information: (C) for both comparisons,  $n = 97$  non-hvNLRs and  $n = 35$  hvNLRs, with  $n$  referring to the number of genes tested. Significance shown is the result of unpaired Wilcoxon rank-sum tests with Benjamini-Hochberg correction for multiple testing. "n.s." indicates a  $P$  value  $> 0.05$ . Source data are available online for this figure.

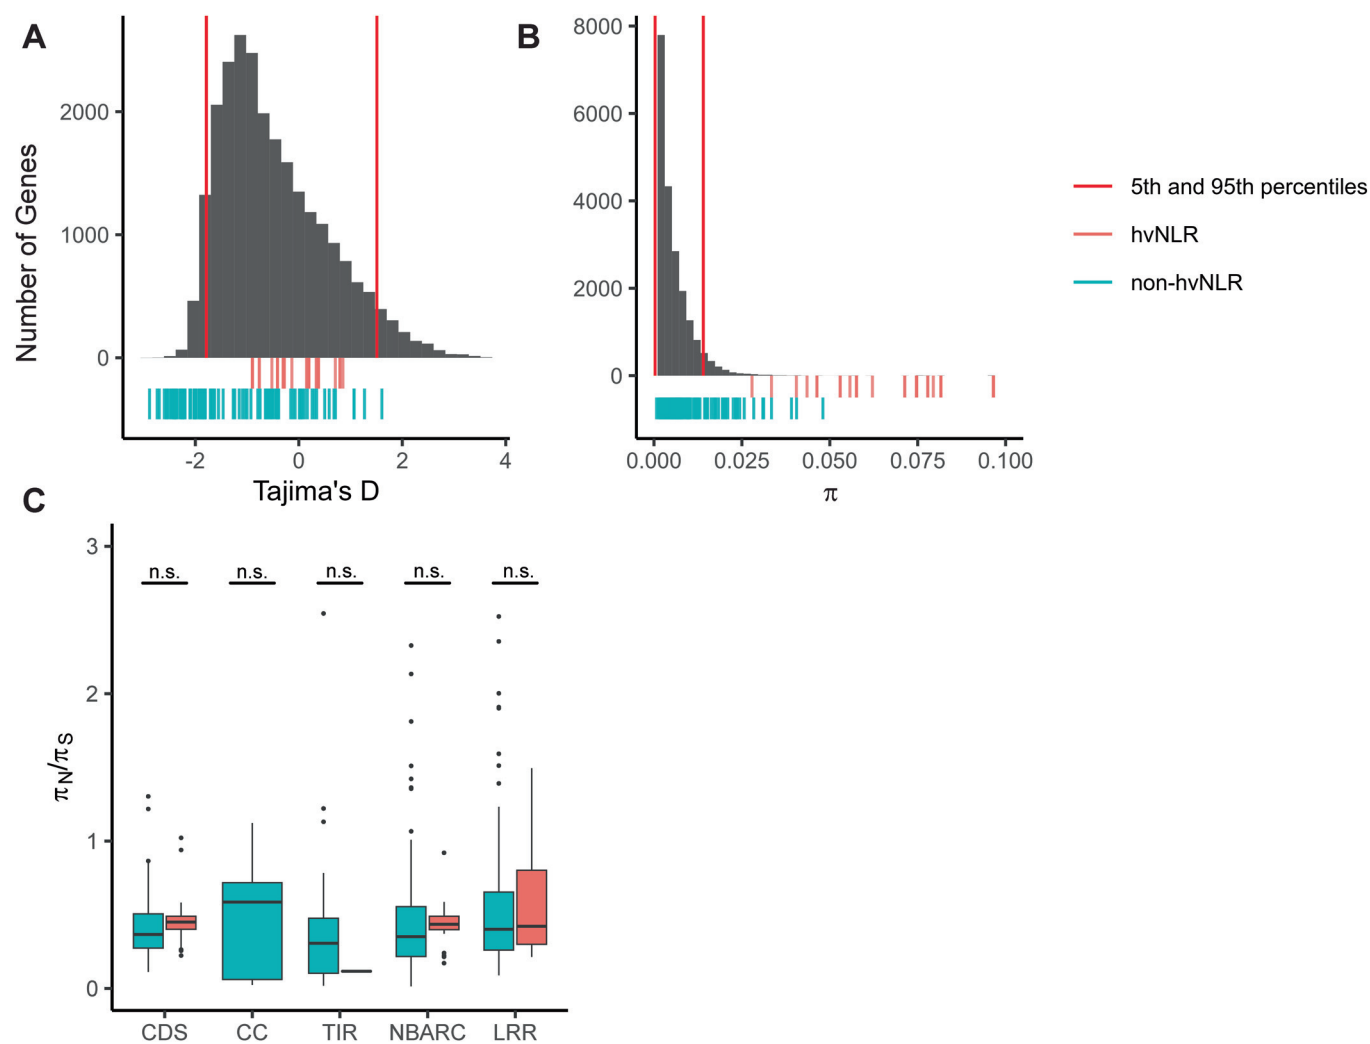

**Figure EV3. Comparison of NLR population genetics statistics to the empirical distribution; per NLR domain  $\pi_N/\pi_S$ .**

(A, B) Empirical distribution of Tajima's D and  $\pi$  calculated on coding sequences of *Arabidopsis* shown as a histogram with 50 bins. The position of hv and non-hvNLRs shown via rug plot beneath the histogram, as well as the 5th and 95th percentiles of the distribution. (C)  $\pi_N/\pi_S$  calculated per domain. Data Information: (C) horizontal black lines denote median values within each box; boxes range from the 25th to 75th percentile of each group's distribution of values; whiskers extend no further than 1.5× the interquartile range of the hinge. Data beyond the end of the whiskers are outlying points and are plotted individually. Significance shown is the result of an unpaired Wilcoxon rank-sum test with Benjamini-Hochberg correction for multiple testing. "n.s." indicates a *P* value > 0.05. Source data are available online for this figure.

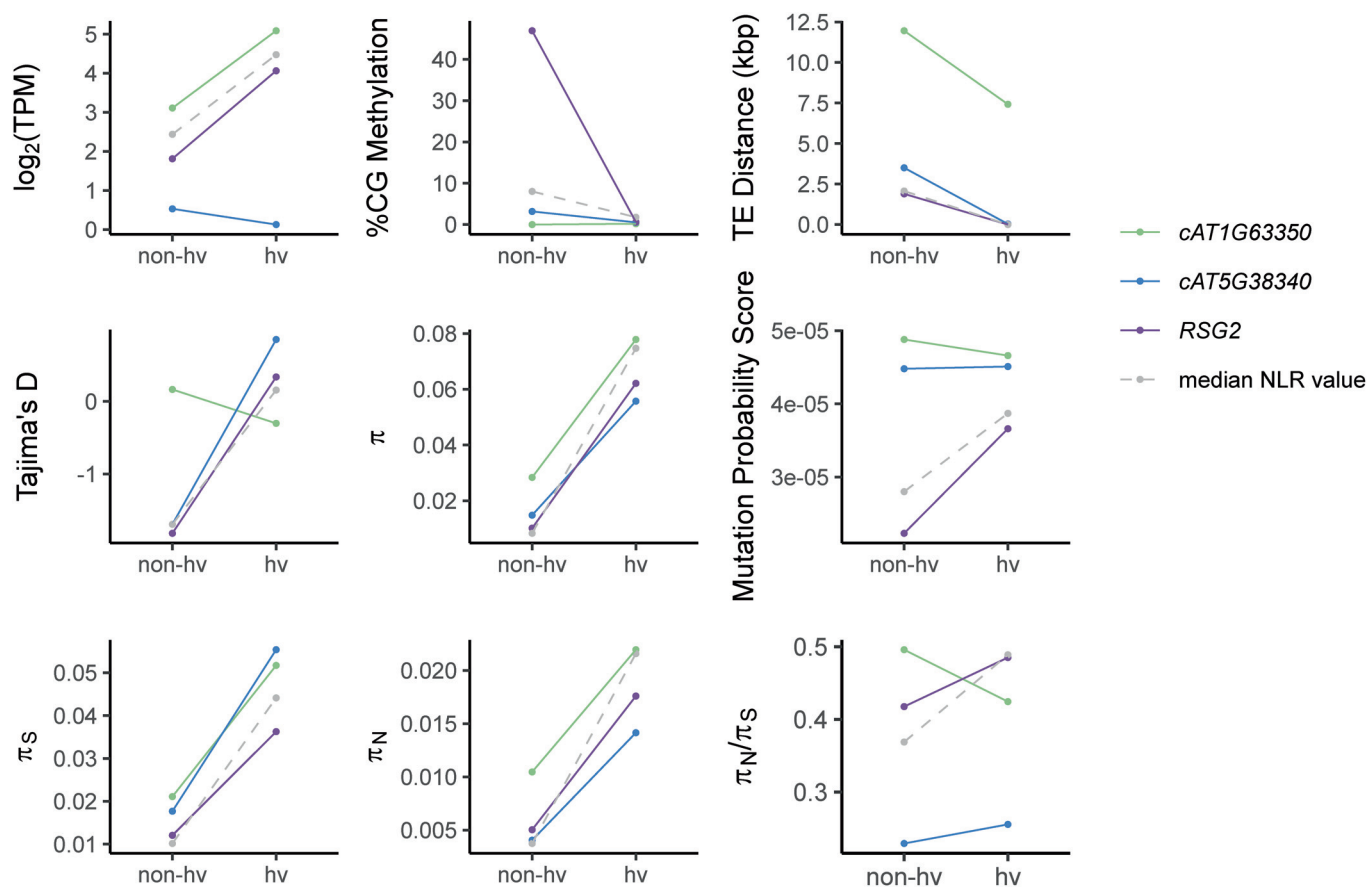

**Figure EV4. Intra-cluster comparison of neighboring hv and non-hvNLRs.**

Described genomic features and population genetics statistics are shown for hv and non-hvNLR pairs in three clusters: *RSG2*, *cAT1G63350*, and *cAT5G38340*. The median of all hv and non-hvNLR values is shown by a grey dotted line. Expression ( $\log_2$  (transcripts per million (TPM))) and % CG methylation shown is from rosette leaf tissue. Source data are available online for this figure.
